# Supplementary material
Source: MDPI journal article supplement (https://www.mdpi.com/2073-8994/9/5/66)
Supplement: s1 [file s1]

**Table S1:** Mapped read metrics for all samples.

| Sample  | Total reads | Total high quality reads | Mapped reads        |
|---------|-------------|--------------------------|---------------------|
| 1       | 33,303,360  | 31,688,748               | 31,559,707 (99.59%) |
| 2       | 28,269,036  | 28,097,504               | 27,855,567 (99.14%) |
| 3       | 24,420,734  | 24,306,410               | 23,934,348 (98.47%) |
| 4       | 36,382,770  | 34,652,838               | 34,418,676 (99.32%) |
| 5       | 31,209,158  | 29,498,204               | 29,211,552 (99.03%) |
| 6       | 27,715,904  | 25,793,532               | 25,702,525 (99.65%) |
| 7       | 34,142,884  | 33,219,054               | 33,042,777 (99.47%) |
| 8       | 29,136,848  | 28,075,056               | 27,552,753 (98.14%) |
| 9       | 36,906,608  | 35,271,298               | 35,040,457 (99.35%) |
| Control | 29,814,074  | 28,519,194               | 28,261,262 (99.10%) |

**Table S2:** Depth of coverage summary with total and average bases and the percentage of the exome covered with at least 2x, 5x, 10, 20x and 30x sequence depth read.

| Sample  | Total   | Average | 2x   | 5x   | 10x  | 20x  | 30x  |
|---------|---------|---------|------|------|------|------|------|
| 1       | 2.62 GB | 51.80   | 98.2 | 97.4 | 94.9 | 84.8 | 70.0 |
| 2       | 2.26 GB | 44.74   | 98.2 | 97.3 | 94.3 | 81.7 | 64.5 |
| 3       | 1.91 GB | 37.65   | 98.1 | 96.8 | 92.3 | 75.1 | 54.9 |
| 4       | 2.85 GB | 56.26   | 98.4 | 97.8 | 96.0 | 87.7 | 75.1 |
| 5       | 2.40 GB | 47.39   | 98.1 | 97.1 | 93.9 | 81.5 | 65.0 |
| 6       | 2.04 GB | 40.26   | 98.1 | 96.7 | 92.5 | 76.5 | 57.2 |
| 7       | 2.70 GB | 53.30   | 98.1 | 97.2 | 94.7 | 85.0 | 70.7 |
| 8       | 1.89 GB | 37.40   | 98.0 | 96.7 | 92.5 | 75.5 | 55.2 |
| 9       | 2.79 GB | 55.07   | 98.2 | 97.3 | 94.9 | 85.5 | 71.8 |
| control | 2.33 GB | 45.93   | 98.0 | 97.0 | 93.9 | 81.4 | 64.4 |
